# Supplementary material for: Development and Validation of a High-Throughput Next-Generation Sequencing Workflow for SARS-CoV-2 Whole Genome Sequencing: Results from Over 65,000 Clinical Cases
Source: Research Square preprint supplement (doi:10.21203/rs.3.rs-997210/v1), 2021-11-12
Supplement: Supplementary file 1 [file 7a85a515fdbb3f97ddc1e5b4.docx]

**SUPPLEMENTARY MATERIALS**


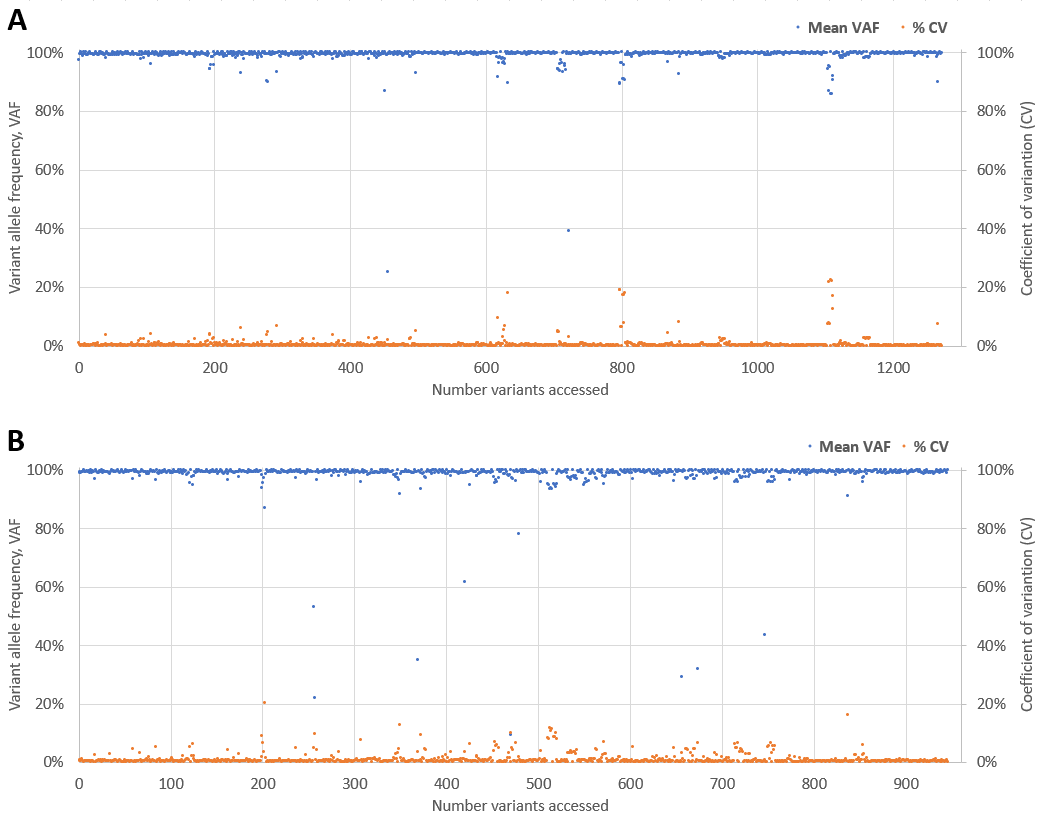


**Figure S1**. **Precision studies using the automated, high-throughput SARS-CoV-2 NGS workflow.** (A) Intra-assay precision of 1,272 variants from 175 specimens repeated 3 times. The mean of the detected variant frequencies (blue dot) and coefficients of variations (orange dot) are shown. (B) Inter-assay precision of 946 variants from 160 specimens replicated 3 times. The mean of the detected variant frequencies (blue dot) and coefficients of variations (orange dot) are shown.


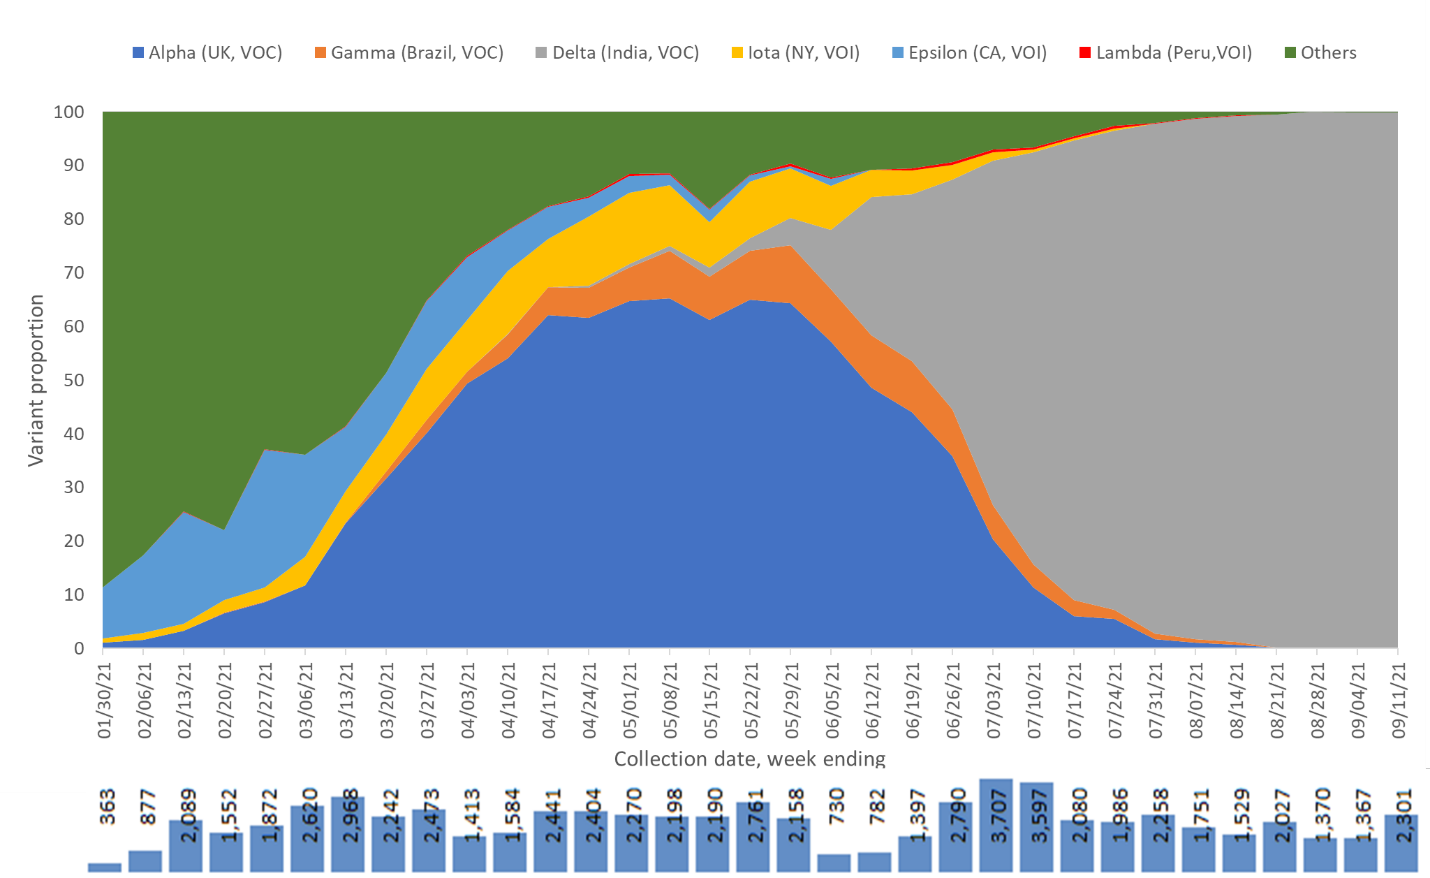


**Figure S2**. Weekly SARS-CoV-2 variant proportions. A. Variant proportions were calculated against total cases sequenced each week. B. Total number of cases sequenced for each week is indicated with scale bar.

**Table S1. Primer pools for the automated, high-throughput SARS-CoV-2 NGS workflow**

| **Primer Name (nCoV-2019_)** | **Sequence (5' to 3')** | **Pool** | **Ratio1** |
| --- | --- | --- | --- |
| 1_LEFT | ACACTCTTTCCCTACACGACGCTCTTCCGATCT ACCAACCAACTTTCGATCTCTTGT | 1A | 1X |
| **1_RIGHTv2** | **GTGACTGGAGTTCAGACGTGTGCTCTTCCGATCT AAGTGCCATCTTTAAGATGTTGACG** | 1A | 1X |
| 2_LEFT | ACACTCTTTCCCTACACGACGCTCTTCCGATCT CTGTTTTACAGGTTCGCGACGT | 2A | 1X |
| 2_RIGHT | GTGACTGGAGTTCAGACGTGTGCTCTTCCGATCT TAAGGATCAGTGCCAAGCTCGT | 2A | 1X |
| 3_LEFT | ACACTCTTTCCCTACACGACGCTCTTCCGATCT CGGTAATAAAGGAGCTGGTGGC | 1B | 1X |
| 3_RIGHT | GTGACTGGAGTTCAGACGTGTGCTCTTCCGATCT AAGGTGTCTGCAATTCATAGCTCT | 1B | 1X |
| 4_LEFT | ACACTCTTTCCCTACACGACGCTCTTCCGATCT GGTGTATACTGCTGCCGTGAAC | 2B | 1X |
| 4_RIGHT | GTGACTGGAGTTCAGACGTGTGCTCTTCCGATCT CACAAGTAGTGGCACCTTCTTTAGT | 2B | 1X |
| 5_LEFT | ACACTCTTTCCCTACACGACGCTCTTCCGATCT TGGTGAAACTTCATGGCAGACG | 1A | 1X |
| 5_RIGHT | GTGACTGGAGTTCAGACGTGTGCTCTTCCGATCT ATTGATGTTGACTTTCTCTTTTTGGAGT | 1A | 1X |
| 6_LEFT | ACACTCTTTCCCTACACGACGCTCTTCCGATCT GGTGTTGTTGGAGAAGGTTCCG | 2A | 1X |
| 6_RIGHT | GTGACTGGAGTTCAGACGTGTGCTCTTCCGATCT TAGCGGCCTTCTGTAAAACACG | 2A | 1X |
| 7_LEFT | ACACTCTTTCCCTACACGACGCTCTTCCGATCT ATCAGAGGCTGCTCGTGTTGTA | 1B | 1X |
| 7_LEFT_alt0 | ACACTCTTTCCCTACACGACGCTCTTCCGATCT CATTTGCATCAGAGGCTGCTCG | 1A | 1X |
| 7_RIGHT | GTGACTGGAGTTCAGACGTGTGCTCTTCCGATCT TGCACAGGTGACAATTTGTCCA | 1B | 1X |
| 7_RIGHT_alt5 | GTGACTGGAGTTCAGACGTGTGCTCTTCCGATCT AGGTGACAATTTGTCCACCGAC | 1A | 1X |
| 8_LEFT | ACACTCTTTCCCTACACGACGCTCTTCCGATCT AGAGTTTCTTAGAGACGGTTGGGA | 2B | 1X |
| 8_RIGHT | GTGACTGGAGTTCAGACGTGTGCTCTTCCGATCT GCTTCAACAGCTTCACTAGTAGGT | 2B | 1X |
| 9_LEFT | ACACTCTTTCCCTACACGACGCTCTTCCGATCT TCCCACAGAAGTGTTAACAGAGGA | 1B | 1X |
| 9_LEFT_alt4 | ACACTCTTTCCCTACACGACGCTCTTCCGATCT TTCCCACAGAAGTGTTAACAGAGG | 1A | 1X |
| **9_RIGHTv2** | **GTGACTGGAGTTCAGACGTGTGCTCTTCCGATCT TTTATGACAGCATCTGCCACAA** | 1B | 1X |
| 9_RIGHT_alt2 | GTGACTGGAGTTCAGACGTGTGCTCTTCCGATCT GACAGCATCTGCCACAACACAG | 1A | 1X |
| 10_LEFT | ACACTCTTTCCCTACACGACGCTCTTCCGATCT TGAGAAGTGCTCTGCCTATACAGT | 2A | 1X |
| 10_RIGHT | GTGACTGGAGTTCAGACGTGTGCTCTTCCGATCT TCATCTAACCAATCTTCTTCTTGCTCT | 2A | 1X |
| 11_LEFT | ACACTCTTTCCCTACACGACGCTCTTCCGATCT GGAATTTGGTGCCACTTCTGCT | 1B | 1X |
| 11_RIGHT | GTGACTGGAGTTCAGACGTGTGCTCTTCCGATCT TCATCAGATTCAACTTGCATGGCA | 1B | 1X |
| 12_LEFT | ACACTCTTTCCCTACACGACGCTCTTCCGATCT AAACATGGAGGAGGTGTTGCAG | 2B | 1X |
| 12_RIGHT | GTGACTGGAGTTCAGACGTGTGCTCTTCCGATCT TTCACTCTTCATTTCCAAAAAGCTTGA | 2B | 1X |
| 13_LEFT | ACACTCTTTCCCTACACGACGCTCTTCCGATCT TCGCACAAATGTCTACTTAGCTGT | 1A | 1X |
| **13_RIGHTv2** | **GTGACTGGAGTTCAGACGTGTGCTCTTCCGATCT ATAACCACAGCAGTTAAAACAC** | 1A | 1X |
| 14_LEFT | ACACTCTTTCCCTACACGACGCTCTTCCGATCT CATCCAGATTCTGCCACTCTTGT | 2A | 1X |
| 14_LEFT_alt4 | ACACTCTTTCCCTACACGACGCTCTTCCGATCT TGGCAATCTTCATCCAGATTCTGC | 2B | 1X |
| 14_RIGHT | GTGACTGGAGTTCAGACGTGTGCTCTTCCGATCT AGTTTCCACACAGACAGGCATT | 2A | 1X |
| 14_RIGHT_alt2 | GTGACTGGAGTTCAGACGTGTGCTCTTCCGATCT TGCGTGTTTCTTCTGCATGTGC | 2B | 1X |
| 15_LEFT | ACACTCTTTCCCTACACGACGCTCTTCCGATCT ACAGTGCTTAAAAAGTGTAAAAGTGCC | 1B | 1X |
| 15_LEFT_alt1 | ACACTCTTTCCCTACACGACGCTCTTCCGATCT AGTGCTTAAAAAGTGTAAAAGTGCCT | 1A | 1X |
| **15_RIGHTv2** | **GTGACTGGAGTTCAGACGTGTGCTCTTCCGATCT AGAAACAGAAACTGTAGCTGGC** | 1B | 1X |
| 15_RIGHT_alt3 | GTGACTGGAGTTCAGACGTGTGCTCTTCCGATCT ACTGTAGCTGGCACTTTGAGAGA | 1A | 1X |
| 16_LEFT | ACACTCTTTCCCTACACGACGCTCTTCCGATCT AATTTGGAAGAAGCTGCTCGGT | 2A | 1X |
| 16_RIGHT | GTGACTGGAGTTCAGACGTGTGCTCTTCCGATCT CACAACTTGCGTGTGGAGGTTA | 2A | 1X |
| 17_LEFT | ACACTCTTTCCCTACACGACGCTCTTCCGATCT CTTCTTTCTTTGAGAGAAGTGAGGACT | 1B | 1X |
| 17_RIGHT | GTGACTGGAGTTCAGACGTGTGCTCTTCCGATCT TTTGTTGGAGTGTTAACAATGCAGT | 1B | 1X |
| 18_LEFT | ACACTCTTTCCCTACACGACGCTCTTCCGATCT TGGAAATACCCACAAGTTAATGGTTTAAC | 2B | 1X |
| 18_LEFT_alt2 | ACACTCTTTCCCTACACGACGCTCTTCCGATCT ACTTCTATTAAATGGGCAGATAACAACTGT | 2A | 1X |
| 18_RIGHT | GTGACTGGAGTTCAGACGTGTGCTCTTCCGATCT AGCTTGTTTACCACACGTACAAGG | 2B | 1X |
| 18_RIGHT_alt1 | GTGACTGGAGTTCAGACGTGTGCTCTTCCGATCT GCTTGTTTACCACACGTACAAGG | 2A | 1X |
| 19_LEFT | ACACTCTTTCCCTACACGACGCTCTTCCGATCT GCTGTTATGTACATGGGCACACT | 1A | 1X |
| 19_RIGHT | GTGACTGGAGTTCAGACGTGTGCTCTTCCGATCT TGTCCAACTTAGGGTCAATTTCTGT | 1A | 1X |
| 20_LEFT | ACACTCTTTCCCTACACGACGCTCTTCCGATCT ACAAAGAAAACAGTTACACAACAACCA | 2B | 1X |
| 20_RIGHT | GTGACTGGAGTTCAGACGTGTGCTCTTCCGATCT ACGTGGCTTTATTAGTTGCATTGTT | 2B | 1X |
| **21_LEFTv2** | **ACACTCTTTCCCTACACGACGCTCTTCCGATCT TGGTGGCTATTGATTATAAACACTACACA** | 1B | 1X |
| 21_LEFT_alt2 | ACACTCTTTCCCTACACGACGCTCTTCCGATCT GGCTATTGATTATAAACACTACACACCCT | 1A | 1X |
| 21_RIGHT | GTGACTGGAGTTCAGACGTGTGCTCTTCCGATCT TAGATCTGTGTGGCCAACCTCT | 1B | 1X |
| 21_RIGHT_alt0 | GTGACTGGAGTTCAGACGTGTGCTCTTCCGATCT GATCTGTGTGGCCAACCTCTTC | 1A | 1X |
| 22_LEFT | ACACTCTTTCCCTACACGACGCTCTTCCGATCT ACTACCGAAGTTGTAGGAGACATTATACT | 2A | 1X |
| 22_RIGHT | GTGACTGGAGTTCAGACGTGTGCTCTTCCGATCT ACAGTATTCTTTGCTATAGTAGTCGGC | 2A | 1X |
| 23_LEFT | ACACTCTTTCCCTACACGACGCTCTTCCGATCT ACAACTACTAACATAGTTACACGGTGT | 1B | 1X |
| 23_RIGHT | GTGACTGGAGTTCAGACGTGTGCTCTTCCGATCT ACCAGTACAGTAGGTTGCAATAGTG | 1B | 1X |
| 24_LEFT | ACACTCTTTCCCTACACGACGCTCTTCCGATCT AGGCATGCCTTCTTACTGTACTG | 2B | 1X |
| 24_RIGHT | GTGACTGGAGTTCAGACGTGTGCTCTTCCGATCT ACATTCTAACCATAGCTGAAATCGGG | 2B | 1X |
| 25_LEFT | ACACTCTTTCCCTACACGACGCTCTTCCGATCT GCAATTGTTTTTCAGCTATTTTGCAGT | 1A | 1X |
| 25_RIGHT | GTGACTGGAGTTCAGACGTGTGCTCTTCCGATCT ACTGTAGTGACAAGTCTCTCGCA | 1A | 1X |
| 26_LEFT | ACACTCTTTCCCTACACGACGCTCTTCCGATCT TTGTGATACATTCTGTGCTGGTAGT | 2A, 2B | 1X |
| 26_RIGHT | GTGACTGGAGTTCAGACGTGTGCTCTTCCGATCT TCCGCACTATCACCAACATCAG | 2A, 2B | 1X |
| 27_LEFT | ACACTCTTTCCCTACACGACGCTCTTCCGATCT ACTACAGTCAGCTTATGTGTCAACC | 1B | 1X |
| 27_RIGHT | GTGACTGGAGTTCAGACGTGTGCTCTTCCGATCT AATACAAGCACCAAGGTCACGG | 1B | 1X |
| 28_LEFT | ACACTCTTTCCCTACACGACGCTCTTCCGATCT ACATAGAAGTTACTGGCGATAGTTGT | 2B | 1X |
| 28_RIGHT | GTGACTGGAGTTCAGACGTGTGCTCTTCCGATCT TGTTTAGACATGACATGAACAGGTGT | 2B | 1X |
| 29_LEFT | ACACTCTTTCCCTACACGACGCTCTTCCGATCT ACTTGTGTTCCTTTTTGTTGCTGC | 1A, 1B | 1X |
| 29_RIGHT | GTGACTGGAGTTCAGACGTGTGCTCTTCCGATCT AGTGTACTCTATAAGTTTTGATGGTGTGT | 1A, 1B | 1X |
| 30_LEFT | ACACTCTTTCCCTACACGACGCTCTTCCGATCT GCACAACTAATGGTGACTTTTTGCA | 2A | 1X |
| 30_RIGHT | GTGACTGGAGTTCAGACGTGTGCTCTTCCGATCT ACCACTAGTAGATACACAAACACCAG | 2A | 1X |
| 31_LEFT | ACACTCTTTCCCTACACGACGCTCTTCCGATCT TTCTGAGTACTGTAGGCACGGC | 1B | 1X |
| 31_RIGHT | GTGACTGGAGTTCAGACGTGTGCTCTTCCGATCT ACAGAATAAACACCAGGTAAGAATGAGT | 1B | 1X |
| 32_LEFT | ACACTCTTTCCCTACACGACGCTCTTCCGATCT TGGTGAATACAGTCATGTAGTTGCC | 2B | 1X |
| **32_RIGHTv2** | **GTGACTGGAGTTCAGACGTGTGCTCTTCCGATCT GGTAATAGCACATCACTACGCAAC** | 2B | 1X |
| 33_LEFT | ACACTCTTTCCCTACACGACGCTCTTCCGATCT ACTTTTGAAGAAGCTGCGCTGT | 1A | 1X |
| 33_RIGHT | GTGACTGGAGTTCAGACGTGTGCTCTTCCGATCT TGGACAGTAAACTACGTCATCAAGC | 1A | 1X |
| 34_LEFT | ACACTCTTTCCCTACACGACGCTCTTCCGATCT TCCCATCTGGTAAAGTTGAGGGT | 2A | 1X |
| 34_RIGHT | GTGACTGGAGTTCAGACGTGTGCTCTTCCGATCT AGTGAAATTGGGCCTCATAGCA | 2A | 1X |
| 35_LEFT | ACACTCTTTCCCTACACGACGCTCTTCCGATCT TGTTCGCATTCAACCAGGACAG | 1B | 1X |
| 35_RIGHT | GTGACTGGAGTTCAGACGTGTGCTCTTCCGATCT ACTTCATAGCCACAAGGTTAAAGTCA | 1B | 1X |
| **36_LEFTv2** | **ACACTCTTTCCCTACACGACGCTCTTCCGATCT ATTACAGTTAATGTTTTAGCTTGGTTGTA** | 2B | 1X |
| 36_RIGHT | GTGACTGGAGTTCAGACGTGTGCTCTTCCGATCT GAACAAAGACCATTGAGTACTCTGGA | 2B | 1X |
| 37_LEFT | ACACTCTTTCCCTACACGACGCTCTTCCGATCT ACACACCACTGGTTGTTACTCAC | 1A | 1X |
| 37_RIGHT | GTGACTGGAGTTCAGACGTGTGCTCTTCCGATCT GTCCACACTCTCCTAGCACCAT | 1A | 1X |
| 38_LEFT | ACACTCTTTCCCTACACGACGCTCTTCCGATCT ACTGTGTTATGTATGCATCAGCTGT | 2A | 1X |
| **38_RIGHTv2** | **GTGACTGGAGTTCAGACGTGTGCTCTTCCGATCT ATCATAAACACCAAGAGTCAGTCTAAA** | 2A | 1X |
| 39_LEFT | ACACTCTTTCCCTACACGACGCTCTTCCGATCT AGTATTGCCCTATTTTCTTCATAACTGGT | 1B | 1X |
| 39_RIGHT | GTGACTGGAGTTCAGACGTGTGCTCTTCCGATCT TGTAACTGGACACATTGAGCCC | 1B | 1X |
| 40_LEFT | ACACTCTTTCCCTACACGACGCTCTTCCGATCT TGCACATCAGTAGTCTTACTCTCAGT | 2B | 1X |
| 40_RIGHT | GTGACTGGAGTTCAGACGTGTGCTCTTCCGATCT CATGGCTGCATCACGGTCAAAT | 2B | 1X |
| 41_LEFT | ACACTCTTTCCCTACACGACGCTCTTCCGATCT GTTCCCTTCCATCATATGCAGCT | 1A | 1X |
| 41_RIGHT | GTGACTGGAGTTCAGACGTGTGCTCTTCCGATCT TGGTATGACAACCATTAGTTTGGCT | 1A | 1X |
| 42_LEFT | ACACTCTTTCCCTACACGACGCTCTTCCGATCT TGCAAGAGATGGTTGTGTTCCC | 2A | 1X |
| 42_RIGHT | GTGACTGGAGTTCAGACGTGTGCTCTTCCGATCT CCTACCTCCCTTTGTTGTGTTGT | 2A | 1X |
| 43_LEFT | ACACTCTTTCCCTACACGACGCTCTTCCGATCT TACGACAGATGTCTTGTGCTGC | 1B | 1X |
| 43_RIGHT | GTGACTGGAGTTCAGACGTGTGCTCTTCCGATCT AGCAGCATCTACAGCAAAAGCA | 1B | 1X |
| 44_LEFT | ACACTCTTTCCCTACACGACGCTCTTCCGATCT TGCCACAGTACGTCTACAAGCT | 2B | 1X |
| 44_LEFT_alt3 | ACACTCTTTCCCTACACGACGCTCTTCCGATCT CCACAGTACGTCTACAAGCTGG | 2A | 1X |
| 44_RIGHT | GTGACTGGAGTTCAGACGTGTGCTCTTCCGATCT AACCTTTCCACATACCGCAGAC | 2B | 1X |
| 44_RIGHT_alt0 | GTGACTGGAGTTCAGACGTGTGCTCTTCCGATCT CGCAGACGGTACAGACTGTGTT | 2A | 1X |
| 45_LEFT | ACACTCTTTCCCTACACGACGCTCTTCCGATCT TACCTACAACTTGTGCTAATGACCC | 1A | 1X |
| 45_LEFT_alt2 | ACACTCTTTCCCTACACGACGCTCTTCCGATCT AGTATGTACAAATACCTACAACTTGTGCT | 1B | 1X |
| 45_RIGHT | GTGACTGGAGTTCAGACGTGTGCTCTTCCGATCT AAATTGTTTCTTCATGTTGGTAGTTAGAGA | 1A | 1X |
| 45_RIGHT_alt7 | GTGACTGGAGTTCAGACGTGTGCTCTTCCGATCT TTCATGTTGGTAGTTAGAGAAAGTGTGTC | 1B | 1X |
| 46_LEFT | ACACTCTTTCCCTACACGACGCTCTTCCGATCT TGTCGCTTCCAAGAAAAGGACG | 2B | 1X |
| 46_LEFT_alt1 | ACACTCTTTCCCTACACGACGCTCTTCCGATCT CGCTTCCAAGAAAAGGACGAAGA | 2A | 1X |
| 46_RIGHT | GTGACTGGAGTTCAGACGTGTGCTCTTCCGATCT CACGTTCACCTAAGTTGGCGTA | 2B | 1X |
| 46_RIGHT_alt2 | GTGACTGGAGTTCAGACGTGTGCTCTTCCGATCT CACGTTCACCTAAGTTGGCGTAT | 2A | 1X |
| 47_LEFT | ACACTCTTTCCCTACACGACGCTCTTCCGATCT AGGACTGGTATGATTTTGTAGAAAACCC | 1A | 1X |
| 47_RIGHT | GTGACTGGAGTTCAGACGTGTGCTCTTCCGATCT AATAACGGTCAAAGAGTTTTAACCTCTC | 1A | 1X |
| 48_LEFT | ACACTCTTTCCCTACACGACGCTCTTCCGATCT TGTTGACACTGACTTAACAAAGCCT | 2B | 1X |
| 48_RIGHT | GTGACTGGAGTTCAGACGTGTGCTCTTCCGATCT TAGATTACCAGAAGCAGCGTGC | 2B | 1X |
| 49_LEFT | ACACTCTTTCCCTACACGACGCTCTTCCGATCT AGGAATTACTTGTGTATGCTGCTGA | 1B | 1X |
| 49_RIGHT | GTGACTGGAGTTCAGACGTGTGCTCTTCCGATCT TGACGATGACTTGGTTAGCATTAATACA | 1B | 1X |
| 50_LEFT | ACACTCTTTCCCTACACGACGCTCTTCCGATCT GTTGATAAGTACTTTGATTGTTACGATGGT | 2A | 1X |
| 50_RIGHT | GTGACTGGAGTTCAGACGTGTGCTCTTCCGATCT TAACATGTTGTGCCAACCACCA | 2A | 1X |
| 51_LEFT | ACACTCTTTCCCTACACGACGCTCTTCCGATCT TCAATAGCCGCCACTAGAGGAG | 1A | 1X |
| 51_RIGHT | GTGACTGGAGTTCAGACGTGTGCTCTTCCGATCT AGTGCATTAACATTGGCCGTGA | 1A | 1X |
| 52_LEFT | ACACTCTTTCCCTACACGACGCTCTTCCGATCT CATCAGGAGATGCCACAACTGC | 2B | 1X |
| 52_RIGHT | GTGACTGGAGTTCAGACGTGTGCTCTTCCGATCT GTTGAGAGCAAAATTCATGAGGTCC | 2B | 1X |
| 53_LEFT | ACACTCTTTCCCTACACGACGCTCTTCCGATCT AGCAAAATGTTGGACTGAGACTGA | 1B | 1X |
| 53_RIGHT | GTGACTGGAGTTCAGACGTGTGCTCTTCCGATCT AGCCTCATAAAACTCAGGTTCCC | 1B | 1X |
| 54_LEFT | ACACTCTTTCCCTACACGACGCTCTTCCGATCT TGAGTTAACAGGACACATGTTAGACA | 2A | 1X |
| 54_RIGHT | GTGACTGGAGTTCAGACGTGTGCTCTTCCGATCT AACCAAAAACTTGTCCATTAGCACA | 2A | 1X |
| 55_LEFT | ACACTCTTTCCCTACACGACGCTCTTCCGATCT ACTCAACTTTACTTAGGAGGTATGAGCT | 1A | 1X |
| 55_RIGHT | GTGACTGGAGTTCAGACGTGTGCTCTTCCGATCT GGTGTACTCTCCTATTTGTACTTTACTGT | 1A | 1X |
| 56_LEFT | ACACTCTTTCCCTACACGACGCTCTTCCGATCT ACCTAGACCACCACTTAACCGA | 2B | 1X |
| 56_RIGHT | GTGACTGGAGTTCAGACGTGTGCTCTTCCGATCT ACACTATGCGAGCAGAAGGGTA | 2B | 1X |
| 57_LEFT | ACACTCTTTCCCTACACGACGCTCTTCCGATCT ATTCTACACTCCAGGGACCACC | 1B | 1X |
| 57_RIGHT | GTGACTGGAGTTCAGACGTGTGCTCTTCCGATCT GTAATTGAGCAGGGTCGCCAAT | 1B | 1X |
| 58_LEFT | ACACTCTTTCCCTACACGACGCTCTTCCGATCT TGATTTGAGTGTTGTCAATGCCAGA | 2A | 1X |
| 58_RIGHT | GTGACTGGAGTTCAGACGTGTGCTCTTCCGATCT CTTTTCTCCAAGCAGGGTTACGT | 2A | 1X |
| 59_LEFT | ACACTCTTTCCCTACACGACGCTCTTCCGATCT TCACGCATGATGTTTCATCTGCA | 1A | 1X |
| 59_RIGHT | GTGACTGGAGTTCAGACGTGTGCTCTTCCGATCT AAGAGTCCTGTTACATTTTCAGCTTG | 1A | 1X |
| 60_LEFT | ACACTCTTTCCCTACACGACGCTCTTCCGATCT TGATAGAGACCTTTATGACAAGTTGCA | 2B | 1X |
| 60_RIGHT | GTGACTGGAGTTCAGACGTGTGCTCTTCCGATCT GGTACCAACAGCTTCTCTAGTAGC | 2B | 1X |
| 61_LEFT | ACACTCTTTCCCTACACGACGCTCTTCCGATCT TGTTTATCACCCGCGAAGAAGC | 1B | 1X |
| 61_RIGHT | GTGACTGGAGTTCAGACGTGTGCTCTTCCGATCT ATCACATAGACAACAGGTGCGC | 1B | 1X |
| 62_LEFT | ACACTCTTTCCCTACACGACGCTCTTCCGATCT GGCACATGGCTTTGAGTTGACA | 2A | 1X |
| 62_RIGHT | GTGACTGGAGTTCAGACGTGTGCTCTTCCGATCT GTTGAACCTTTCTACAAGCCGC | 2A | 1X |
| 63_LEFT | ACACTCTTTCCCTACACGACGCTCTTCCGATCT TGTTAAGCGTGTTGACTGGACT | 1A | 1X |
| 63_RIGHT | GTGACTGGAGTTCAGACGTGTGCTCTTCCGATCT ACAAACTGCCACCATCACAACC | 1A | 1X |
| 64_LEFT | ACACTCTTTCCCTACACGACGCTCTTCCGATCT TCGATAGATATCCTGCTAATTCCATTGT | 2B | 1X |
| 64_RIGHT | GTGACTGGAGTTCAGACGTGTGCTCTTCCGATCT AGTCTTGTAAAAGTGTTCCAGAGGT | 2B | 1X |
| 65_LEFT | ACACTCTTTCCCTACACGACGCTCTTCCGATCT GCTGGCTTTAGCTTGTGGGTTT | 1B | 1X |
| 65_RIGHT | GTGACTGGAGTTCAGACGTGTGCTCTTCCGATCT TGTCAGTCATAGAACAAACACCAATAGT | 1B | 1X |
| 66_LEFT | ACACTCTTTCCCTACACGACGCTCTTCCGATCT GGGTGTGGACATTGCTGCTAAT | 2A | 1X |
| 66_RIGHT | GTGACTGGAGTTCAGACGTGTGCTCTTCCGATCT TCAATTTCCATTTGACTCCTGGGT | 2A | 1X |
| 67_LEFT | ACACTCTTTCCCTACACGACGCTCTTCCGATCT GTTGTCCAACAATTACCTGAAACTTACT | 1A, 1B | 1X |
| 67_RIGHT | GTGACTGGAGTTCAGACGTGTGCTCTTCCGATCT CAACCTTAGAAACTACAGATAAATCTTGGG | 1A, 1B | 1X |
| 68_LEFT | ACACTCTTTCCCTACACGACGCTCTTCCGATCT ACAGGTTCATCTAAGTGTGTGTGT | 2A, 2B | 1X |
| 68_RIGHT | GTGACTGGAGTTCAGACGTGTGCTCTTCCGATCT CTCCTTTATCAGAACCAGCACCA | 2A, 2B | 1X |
| 69_LEFT | ACACTCTTTCCCTACACGACGCTCTTCCGATCT TGTCGCAAAATATACTCAACTGTGTCA | 1B | 1X |
| 69_RIGHT | GTGACTGGAGTTCAGACGTGTGCTCTTCCGATCT TCTTTATAGCCACGGAACCTCCA | 1B | 1X |
| 70_LEFT | ACACTCTTTCCCTACACGACGCTCTTCCGATCT ACAAAAGAAAATGACTCTAAAGAGGGTTT | 2B | 1X |
| 70_RIGHT | GTGACTGGAGTTCAGACGTGTGCTCTTCCGATCT TGACCTTCTTTTAAAGACATAACAGCAG | 2B | 1X |
| 71_LEFT | ACACTCTTTCCCTACACGACGCTCTTCCGATCT ACAAATCCAATTCAGTTGTCTTCCTATTC | 1A | 1X |
| 71_RIGHT | GTGACTGGAGTTCAGACGTGTGCTCTTCCGATCT TGGAAAAGAAAGGTAAGAACAAGTCCT | 1A | 1X |
| 72_LEFT | ACACTCTTTCCCTACACGACGCTCTTCCGATCT ACACGTGGTGTTTATTACCCTGAC | 2B | 1X |
| 72_RIGHT | GTGACTGGAGTTCAGACGTGTGCTCTTCCGATCT ACTCTGAACTCACTTTCCATCCAAC | 2B | 1X |
| 73_LEFT | ACACTCTTTCCCTACACGACGCTCTTCCGATCT CAATTTTGTAATGATCCATTTTTGGGTGT | 1B | 1X |
| 73_RIGHT | GTGACTGGAGTTCAGACGTGTGCTCTTCCGATCT CACCAGCTGTCCAACCTGAAGA | 1B | 1X |
| 74_LEFT | ACACTCTTTCCCTACACGACGCTCTTCCGATCT ACATCACTAGGTTTCAAACTTTACTTGC | 2A, 2B | 2X |
| 74_RIGHT | GTGACTGGAGTTCAGACGTGTGCTCTTCCGATCT GCAACACAGTTGCTGATTCTCTTC | 2A, 2B | 2X |
| 75_LEFT | ACACTCTTTCCCTACACGACGCTCTTCCGATCT AGAGTCCAACCAACAGAATCTATTGT | 1A, 1B | 1X |
| 75_RIGHT | GTGACTGGAGTTCAGACGTGTGCTCTTCCGATCT ACCACCAACCTTAGAATCAAGATTGT | 1A, 1B | 1X |
| 76_LEFT | ACACTCTTTCCCTACACGACGCTCTTCCGATCT AGGGCAAACTGGAAAGATTGCT | 2B | 1X |
| 76_LEFT_alt3 | ACACTCTTTCCCTACACGACGCTCTTCCGATCT GGGCAAACTGGAAAGATTGCTGA | 2A | 1X |
| **76_RIGHTv2** | **GTGACTGGAGTTCAGACGTGTGCTCTTCCGATCT TCTCTGCCAAATTGTTGGAAAGGCA** | 2B | 1X |
| 76_RIGHT_alt0 | GTGACTGGAGTTCAGACGTGTGCTCTTCCGATCT ACCTGTGCCTGTTAAACCATTGA | 2A | 1X |
| 77_LEFT | ACACTCTTTCCCTACACGACGCTCTTCCGATCT CCAGCAACTGTTTGTGGACCTA | 1B | 1X |
| 77_RIGHT | GTGACTGGAGTTCAGACGTGTGCTCTTCCGATCT CAGCCCCTATTAAACAGCCTGC | 1B | 1X |
| 78_LEFT | ACACTCTTTCCCTACACGACGCTCTTCCGATCT CAACTTACTCCTACTTGGCGTGT | 2B | 1X |
| 78_RIGHT | GTGACTGGAGTTCAGACGTGTGCTCTTCCGATCT TGTGTACAAAAACTGCCATATTGCA | 2B | 1X |
| 79_LEFT | ACACTCTTTCCCTACACGACGCTCTTCCGATCT GTGGTGATTCAACTGAATGCAGC | 1A, 1B | 1X |
| 79_RIGHT | GTGACTGGAGTTCAGACGTGTGCTCTTCCGATCT CATTTCATCTGTGAGCAAAGGTGG | 1A, 1B | 1X |
| 80_LEFT | ACACTCTTTCCCTACACGACGCTCTTCCGATCT TTGCCTTGGTGATATTGCTGCT | 2A | 1X |
| 80_RIGHT | GTGACTGGAGTTCAGACGTGTGCTCTTCCGATCT TGGAGCTAAGTTGTTTAACAAGCG | 2A | 1X |
| 81_LEFT | ACACTCTTTCCCTACACGACGCTCTTCCGATCT GCACTTGGAAAACTTCAAGATGTGG | 1B | 1X |
| 81_RIGHT | GTGACTGGAGTTCAGACGTGTGCTCTTCCGATCT GTGAAGTTCTTTTCTTGTGCAGGG | 1B | 1X |
| 82_LEFT | ACACTCTTTCCCTACACGACGCTCTTCCGATCT GGGCTATCATCTTATGTCCTTCCCT | 2B | 1X |
| 82_RIGHT | GTGACTGGAGTTCAGACGTGTGCTCTTCCGATCT TGCCAGAGATGTCACCTAAATCAA | 2B | 1X |
| 83_LEFT | ACACTCTTTCCCTACACGACGCTCTTCCGATCT TCCTTTGCAACCTGAATTAGACTCA | 1A | 1X |
| 83_RIGHT | GTGACTGGAGTTCAGACGTGTGCTCTTCCGATCT TTTGACTCCTTTGAGCACTGGC | 1A | 1X |
| 84_LEFT | ACACTCTTTCCCTACACGACGCTCTTCCGATCT TGCTGTAGTTGTCTCAAGGGCT | 2A | 1X |
| 84_RIGHT | GTGACTGGAGTTCAGACGTGTGCTCTTCCGATCT AGGTGTGAGTAAACTGTTACAAACAAC | 2A | 1X |
| 85_LEFT | ACACTCTTTCCCTACACGACGCTCTTCCGATCT ACTAGCACTCTCCAAGGGTGTT | 1B | 1X |
| 85_RIGHT | GTGACTGGAGTTCAGACGTGTGCTCTTCCGATCT ACACAGTCTTTTACTCCAGATTCCC | 1B | 1X |
| 86_LEFT | ACACTCTTTCCCTACACGACGCTCTTCCGATCT TCAGGTGATGGCACAACAAGTC | 2B | 1X |
| 86_RIGHT | GTGACTGGAGTTCAGACGTGTGCTCTTCCGATCT ACGAAAGCAAGAAAAAGAAGTACGC | 2B | 1X |
| 87_LEFT | ACACTCTTTCCCTACACGACGCTCTTCCGATCT CGACTACTAGCGTGCCTTTGTA | 1A | 1X |
| 87_RIGHT | GTGACTGGAGTTCAGACGTGTGCTCTTCCGATCT ACTAGGTTCCATTGTTCAAGGAGC | 1A | 1X |
| 88_LEFT | ACACTCTTTCCCTACACGACGCTCTTCCGATCT CCATGGCAGATTCCAACGGTAC | 2A | 1X |
| 88_RIGHT | GTGACTGGAGTTCAGACGTGTGCTCTTCCGATCT TGGTCAGAATAGTGCCATGGAGT | 2A | 1X |
| **89_LEFTv2** | **ACACTCTTTCCCTACACGACGCTCTTCCGATCT CGCGTACGCGTTCCATGTGGTC** | 1B | 1X |
| 89_LEFT_alt2 | ACACTCTTTCCCTACACGACGCTCTTCCGATCT CGCGTTCCATGTGGTCATTCAA | 1A | 1X |
| **89_RIGHTv2** | **GTGACTGGAGTTCAGACGTGTGCTCTTCCGATCT ATAGTAACCTGAAAGTCAACGAGAT** | 1B | 1X |
| 89_RIGHT_alt4 | GTGACTGGAGTTCAGACGTGTGCTCTTCCGATCT ACGAGATGAAACATCTGTTGTCACT | 1A | 1X |
| 90_LEFT | ACACTCTTTCCCTACACGACGCTCTTCCGATCT ACACAGACCATTCCAGTAGCAGT | 2B | 1X |
| 90_RIGHT | GTGACTGGAGTTCAGACGTGTGCTCTTCCGATCT TGAAATGGTGAATTGCCCTCGT | 2B | 1X |
| 91_LEFT | ACACTCTTTCCCTACACGACGCTCTTCCGATCT TCACTACCAAGAGTGTGTTAGAGGT | 1B | 1X |
| 91_RIGHT | GTGACTGGAGTTCAGACGTGTGCTCTTCCGATCT TTCAAGTGAGAACCAAAAGATAATAAGCA | 1B | 1X |
| 92_LEFT | ACACTCTTTCCCTACACGACGCTCTTCCGATCT TTTGTGCTTTTTAGCCTTTCTGCT | 2A | 1X |
| 92_RIGHT | GTGACTGGAGTTCAGACGTGTGCTCTTCCGATCT AGGTTCCTGGCAATTAATTGTAAAAGG | 2A | 1X |
| 93_LEFT | ACACTCTTTCCCTACACGACGCTCTTCCGATCT TGAGGCTGGTTCTAAATCACCCA | 1A | 1X |
| 93_RIGHT | GTGACTGGAGTTCAGACGTGTGCTCTTCCGATCT AGGTCTTCCTTGCCATGTTGAG | 1A | 1X |
| 94_LEFT | ACACTCTTTCCCTACACGACGCTCTTCCGATCT GGCCCCAAGGTTTACCCAATAA | 2B | 1X |
| 94_RIGHT | GTGACTGGAGTTCAGACGTGTGCTCTTCCGATCT TTTGGCAATGTTGTTCCTTGAGG | 2B | 1X |
| 95_LEFT | ACACTCTTTCCCTACACGACGCTCTTCCGATCT TGAGGGAGCCTTGAATACACCA | 1B | 1X |
| 95_RIGHT | GTGACTGGAGTTCAGACGTGTGCTCTTCCGATCT CAGTACGTTTTTGCCGAGGCTT | 1B | 1X |
| 96_LEFT | ACACTCTTTCCCTACACGACGCTCTTCCGATCT GCCAACAACAACAAGGCCAAAC | 2A | 1X |
| 96_RIGHT | GTGACTGGAGTTCAGACGTGTGCTCTTCCGATCT TAGGCTCTGTTGGTGGGAATGT | 2A | 1X |
| 97_LEFT | ACACTCTTTCCCTACACGACGCTCTTCCGATCT TGGATGACAAAGATCCAAATTTCAAAGA | 1A | 1X |
| 97_RIGHT | GTGACTGGAGTTCAGACGTGTGCTCTTCCGATCT ACACACTGATTAAAGATTGCTATGTGAG | 1A | 1X |
| 98_LEFT | ACACTCTTTCCCTACACGACGCTCTTCCGATCT AACAATTGCAACAATCCATGAGCA | 2B | 1X |
| 98_RIGHT | GTGACTGGAGTTCAGACGTGTGCTCTTCCGATCT TTCTCCTAAGAAGCTATTAAAATCACATGG | 2B | 1X |

**1** Relative primer concentration in each pool is indicated under Ratio.

SARS-CoV-2 specific sequences are from the ARTICv3 primer set (Quick 2020).

Primers from Itokawa et al (2020) are marked in bold.

Quick J, Loman NJ. hCoV-2019/nCoV-2019 Version 3 Amplicon Set. March 24, 2020. Available: <https://artic.network/resources/ncov/ncov-amplicon-v3.pdf>.

Itokawa K, Sekizuka T, Hashino M, Tanaka R, Kuroda M (2020) Disentangling primer interactions improves SARS-CoV-2 genome sequencing by multiplex tiling PCR. PLoS ONE 15(9): e0239403.

**Table S2. Modified primer concentration for each pool for a standard ARTIC v3 workflow**

| **Primer Name (nCoV-2019_)** | **Sequence (5' to 3')** | **Pool** | **Ratio1** |
| --- | --- | --- | --- |
| 1_LEFT | ACCAACCAACTTTCGATCTCTTGT | 1 | 1X |
| 1_RIGHT | CATCTTTAAGATGTTGACGTGCCTC | 1 | 1X |
| 2_LEFT | CTGTTTTACAGGTTCGCGACGT | 2 | 1X |
| 2_RIGHT | TAAGGATCAGTGCCAAGCTCGT | 2 | 1X |
| 3_LEFT | CGGTAATAAAGGAGCTGGTGGC | 1 | 1X |
| 3_RIGHT | AAGGTGTCTGCAATTCATAGCTCT | 1 | 1X |
| 4_LEFT | GGTGTATACTGCTGCCGTGAAC | 2 | 1X |
| 4_RIGHT | CACAAGTAGTGGCACCTTCTTTAGT | 2 | 1X |
| 5_LEFT | TGGTGAAACTTCATGGCAGACG | 1 | 7X |
| 5_RIGHT | ATTGATGTTGACTTTCTCTTTTTGGAGT | 1 | 7X |
| 6_LEFT | GGTGTTGTTGGAGAAGGTTCCG | 2 | 2.5X |
| 6_RIGHT | TAGCGGCCTTCTGTAAAACACG | 2 | 2.5X |
| 7_LEFT | ATCAGAGGCTGCTCGTGTTGTA | 1 | 1X |
| 7_LEFT_alt0 | CATTTGCATCAGAGGCTGCTCG | 1 | 1X |
| 7_RIGHT | TGCACAGGTGACAATTTGTCCA | 1 | 1X |
| 7_RIGHT_alt5 | AGGTGACAATTTGTCCACCGAC | 1 | 1X |
| 8_LEFT | AGAGTTTCTTAGAGACGGTTGGGA | 2 | 1X |
| 8_RIGHT | GCTTCAACAGCTTCACTAGTAGGT | 2 | 1X |
| 9_LEFT | TCCCACAGAAGTGTTAACAGAGGA | 1 | 1X |
| 9_LEFT_alt4 | TTCCCACAGAAGTGTTAACAGAGG | 1 | 1X |
| 9_RIGHT | ATGACAGCATCTGCCACAACAC | 1 | 1X |
| 9_RIGHT_alt2 | GACAGCATCTGCCACAACACAG | 1 | 1X |
| 10_LEFT | TGAGAAGTGCTCTGCCTATACAGT | 2 | 1X |
| 10_RIGHT | TCATCTAACCAATCTTCTTCTTGCTCT | 2 | 1X |
| 11_LEFT | GGAATTTGGTGCCACTTCTGCT | 1 | 1X |
| 11_RIGHT | TCATCAGATTCAACTTGCATGGCA | 1 | 1X |
| 12_LEFT | AAACATGGAGGAGGTGTTGCAG | 2 | 7X |
| 12_RIGHT | TTCACTCTTCATTTCCAAAAAGCTTGA | 2 | 7X |
| 13_LEFT | TCGCACAAATGTCTACTTAGCTGT | 1 | 7X |
| 13_RIGHT | ACCACAGCAGTTAAAACACCCT | 1 | 7X |
| 14_LEFT | CATCCAGATTCTGCCACTCTTGT | 2 | 1X |
| 14_LEFT_alt4 | TGGCAATCTTCATCCAGATTCTGC | 2 | 1X |
| 14_RIGHT | AGTTTCCACACAGACAGGCATT | 2 | 1X |
| 14_RIGHT_alt2 | TGCGTGTTTCTTCTGCATGTGC | 2 | 1X |
| 15_LEFT | ACAGTGCTTAAAAAGTGTAAAAGTGCC | 1 | 1X |
| 15_LEFT_alt1 | AGTGCTTAAAAAGTGTAAAAGTGCCT | 1 | 1X |
| 15_RIGHT | AACAGAAACTGTAGCTGGCACT | 1 | 1X |
| 15_RIGHT_alt3 | ACTGTAGCTGGCACTTTGAGAGA | 1 | 1X |
| 16_LEFT | AATTTGGAAGAAGCTGCTCGGT | 2 | 1X |
| 16_RIGHT | CACAACTTGCGTGTGGAGGTTA | 2 | 1X |
| 17_LEFT | CTTCTTTCTTTGAGAGAAGTGAGGACT | 1 | 7X |
| 17_RIGHT | TTTGTTGGAGTGTTAACAATGCAGT | 1 | 7X |
| 18_LEFT | TGGAAATACCCACAAGTTAATGGTTTAAC | 2 | 1X |
| 18_LEFT_alt2 | ACTTCTATTAAATGGGCAGATAACAACTGT | 2 | 1X |
| 18_RIGHT | AGCTTGTTTACCACACGTACAAGG | 2 | 1X |
| 18_RIGHT_alt1 | GCTTGTTTACCACACGTACAAGG | 2 | 1X |
| 19_LEFT | GCTGTTATGTACATGGGCACACT | 1 | 2.5X |
| 19_RIGHT | TGTCCAACTTAGGGTCAATTTCTGT | 1 | 2.5X |
| 20_LEFT | ACAAAGAAAACAGTTACACAACAACCA | 2 | 1X |
| 20_RIGHT | ACGTGGCTTTATTAGTTGCATTGTT | 2 | 1X |
| 21_LEFT | TGGCTATTGATTATAAACACTACACACCC | 1 | 7X |
| 21_LEFT_alt2 | GGCTATTGATTATAAACACTACACACCCT | 1 | 7X |
| 21_RIGHT | TAGATCTGTGTGGCCAACCTCT | 1 | 7X |
| 21_RIGHT_alt0 | GATCTGTGTGGCCAACCTCTTC | 1 | 7X |
| 22_LEFT | ACTACCGAAGTTGTAGGAGACATTATACT | 2 | 1X |
| 22_RIGHT | ACAGTATTCTTTGCTATAGTAGTCGGC | 2 | 1X |
| 23_LEFT | ACAACTACTAACATAGTTACACGGTGT | 1 | 7X |
| 23_RIGHT | ACCAGTACAGTAGGTTGCAATAGTG | 1 | 7X |
| 24_LEFT | AGGCATGCCTTCTTACTGTACTG | 2 | 1X |
| 24_RIGHT | ACATTCTAACCATAGCTGAAATCGGG | 2 | 1X |
| 25_LEFT | GCAATTGTTTTTCAGCTATTTTGCAGT | 1 | 1X |
| 25_RIGHT | ACTGTAGTGACAAGTCTCTCGCA | 1 | 1X |
| 26_LEFT | TTGTGATACATTCTGTGCTGGTAGT | 2 | 7X |
| 26_RIGHT | TCCGCACTATCACCAACATCAG | 2 | 7X |
| 27_LEFT | ACTACAGTCAGCTTATGTGTCAACC | 1 | 1X |
| 27_RIGHT | AATACAAGCACCAAGGTCACGG | 1 | 1X |
| 28_LEFT | ACATAGAAGTTACTGGCGATAGTTGT | 2 | 2.5X |
| 28_RIGHT | TGTTTAGACATGACATGAACAGGTGT | 2 | 2.5X |
| 29_LEFT | ACTTGTGTTCCTTTTTGTTGCTGC | 1 | 2.5X |
| 29_RIGHT | AGTGTACTCTATAAGTTTTGATGGTGTGT | 1 | 2.5X |
| 30_LEFT | GCACAACTAATGGTGACTTTTTGCA | 2 | 1X |
| 30_RIGHT | ACCACTAGTAGATACACAAACACCAG | 2 | 1X |
| 31_LEFT | TTCTGAGTACTGTAGGCACGGC | 1 | 1X |
| 31_RIGHT | ACAGAATAAACACCAGGTAAGAATGAGT | 1 | 1X |
| 32_LEFT | TGGTGAATACAGTCATGTAGTTGCC | 2 | 1X |
| 32_RIGHT | AGCACATCACTACGCAACTTTAGA | 2 | 1X |
| 33_LEFT | ACTTTTGAAGAAGCTGCGCTGT | 1 | 1X |
| 33_RIGHT | TGGACAGTAAACTACGTCATCAAGC | 1 | 1X |
| 34_LEFT | TCCCATCTGGTAAAGTTGAGGGT | 2 | 1X |
| 34_RIGHT | AGTGAAATTGGGCCTCATAGCA | 2 | 1X |
| 35_LEFT | TGTTCGCATTCAACCAGGACAG | 1 | 1X |
| 35_RIGHT | ACTTCATAGCCACAAGGTTAAAGTCA | 1 | 1X |
| 36_LEFT | TTAGCTTGGTTGTACGCTGCTG | 2 | 2.5X |
| 36_RIGHT | GAACAAAGACCATTGAGTACTCTGGA | 2 | 2.5X |
| 37_LEFT | ACACACCACTGGTTGTTACTCAC | 1 | 1X |
| 37_RIGHT | GTCCACACTCTCCTAGCACCAT | 1 | 1X |
| 38_LEFT | ACTGTGTTATGTATGCATCAGCTGT | 2 | 2.5X |
| 38_RIGHT | CACCAAGAGTCAGTCTAAAGTAGCG | 2 | 2.5X |
| 39_LEFT | AGTATTGCCCTATTTTCTTCATAACTGGT | 1 | 1X |
| 39_RIGHT | TGTAACTGGACACATTGAGCCC | 1 | 1X |
| 40_LEFT | TGCACATCAGTAGTCTTACTCTCAGT | 2 | 1X |
| 40_RIGHT | CATGGCTGCATCACGGTCAAAT | 2 | 1X |
| 41_LEFT | GTTCCCTTCCATCATATGCAGCT | 1 | 1X |
| 41_RIGHT | TGGTATGACAACCATTAGTTTGGCT | 1 | 1X |
| 42_LEFT | TGCAAGAGATGGTTGTGTTCCC | 2 | 1X |
| 42_RIGHT | CCTACCTCCCTTTGTTGTGTTGT | 2 | 1X |
| 43_LEFT | TACGACAGATGTCTTGTGCTGC | 1 | 1X |
| 43_RIGHT | AGCAGCATCTACAGCAAAAGCA | 1 | 1X |
| 44_LEFT | TGCCACAGTACGTCTACAAGCT | 2 | 1X |
| 44_LEFT_alt3 | CCACAGTACGTCTACAAGCTGG | 2 | 1X |
| 44_RIGHT | AACCTTTCCACATACCGCAGAC | 2 | 1X |
| 44_RIGHT_alt0 | CGCAGACGGTACAGACTGTGTT | 2 | 1X |
| 45_LEFT | TACCTACAACTTGTGCTAATGACCC | 1 | 1X |
| 45_LEFT_alt2 | AGTATGTACAAATACCTACAACTTGTGCT | 1 | 1X |
| 45_RIGHT | AAATTGTTTCTTCATGTTGGTAGTTAGAGA | 1 | 1X |
| 45_RIGHT_alt7 | TTCATGTTGGTAGTTAGAGAAAGTGTGTC | 1 | 1X |
| 46_LEFT | TGTCGCTTCCAAGAAAAGGACG | 2 | 1X |
| 46_LEFT_alt1 | CGCTTCCAAGAAAAGGACGAAGA | 2 | 1X |
| 46_RIGHT | CACGTTCACCTAAGTTGGCGTA | 2 | 1X |
| 46_RIGHT_alt2 | CACGTTCACCTAAGTTGGCGTAT | 2 | 1X |
| 47_LEFT | AGGACTGGTATGATTTTGTAGAAAACCC | 1 | 1X |
| 47_RIGHT | AATAACGGTCAAAGAGTTTTAACCTCTC | 1 | 1X |
| 48_LEFT | TGTTGACACTGACTTAACAAAGCCT | 2 | 1X |
| 48_RIGHT | TAGATTACCAGAAGCAGCGTGC | 2 | 1X |
| 49_LEFT | AGGAATTACTTGTGTATGCTGCTGA | 1 | 1X |
| 49_RIGHT | TGACGATGACTTGGTTAGCATTAATACA | 1 | 1X |
| 50_LEFT | GTTGATAAGTACTTTGATTGTTACGATGGT | 2 | 1X |
| 50_RIGHT | TAACATGTTGTGCCAACCACCA | 2 | 1X |
| 51_LEFT | TCAATAGCCGCCACTAGAGGAG | 1 | 1X |
| 51_RIGHT | AGTGCATTAACATTGGCCGTGA | 1 | 1X |
| 52_LEFT | CATCAGGAGATGCCACAACTGC | 2 | 1X |
| 52_RIGHT | GTTGAGAGCAAAATTCATGAGGTCC | 2 | 1X |
| 53_LEFT | AGCAAAATGTTGGACTGAGACTGA | 1 | 1X |
| 53_RIGHT | AGCCTCATAAAACTCAGGTTCCC | 1 | 1X |
| 54_LEFT | TGAGTTAACAGGACACATGTTAGACA | 2 | 1X |
| 54_RIGHT | AACCAAAAACTTGTCCATTAGCACA | 2 | 1X |
| 55_LEFT | ACTCAACTTTACTTAGGAGGTATGAGCT | 1 | 1X |
| 55_RIGHT | GGTGTACTCTCCTATTTGTACTTTACTGT | 1 | 1X |
| 56_LEFT | ACCTAGACCACCACTTAACCGA | 2 | 1X |
| 56_RIGHT | ACACTATGCGAGCAGAAGGGTA | 2 | 1X |
| 57_LEFT | ATTCTACACTCCAGGGACCACC | 1 | 1X |
| 57_RIGHT | GTAATTGAGCAGGGTCGCCAAT | 1 | 1X |
| 58_LEFT | TGATTTGAGTGTTGTCAATGCCAGA | 2 | 1X |
| 58_RIGHT | CTTTTCTCCAAGCAGGGTTACGT | 2 | 1X |
| 59_LEFT | TCACGCATGATGTTTCATCTGCA | 1 | 1X |
| 59_RIGHT | AAGAGTCCTGTTACATTTTCAGCTTG | 1 | 1X |
| 60_LEFT | TGATAGAGACCTTTATGACAAGTTGCA | 2 | 1X |
| 60_RIGHT | GGTACCAACAGCTTCTCTAGTAGC | 2 | 1X |
| 61_LEFT | TGTTTATCACCCGCGAAGAAGC | 1 | 1X |
| 61_RIGHT | ATCACATAGACAACAGGTGCGC | 1 | 1X |
| 62_LEFT | GGCACATGGCTTTGAGTTGACA | 2 | 1X |
| 62_RIGHT | GTTGAACCTTTCTACAAGCCGC | 2 | 1X |
| 63_LEFT | TGTTAAGCGTGTTGACTGGACT | 1 | 1X |
| 63_RIGHT | ACAAACTGCCACCATCACAACC | 1 | 1X |
| 64_LEFT | TCGATAGATATCCTGCTAATTCCATTGT | 2 | 7X |
| 64_RIGHT | AGTCTTGTAAAAGTGTTCCAGAGGT | 2 | 7X |
| 65_LEFT | GCTGGCTTTAGCTTGTGGGTTT | 1 | 1X |
| 65_RIGHT | TGTCAGTCATAGAACAAACACCAATAGT | 1 | 1X |
| 66_LEFT | GGGTGTGGACATTGCTGCTAAT | 2 | 7X |
| 66_RIGHT | TCAATTTCCATTTGACTCCTGGGT | 2 | 7X |
| 67_LEFT | GTTGTCCAACAATTACCTGAAACTTACT | 1 | 1X |
| 67_RIGHT | CAACCTTAGAAACTACAGATAAATCTTGGG | 1 | 1X |
| 68_LEFT | ACAGGTTCATCTAAGTGTGTGTGT | 2 | 1X |
| 68_RIGHT | CTCCTTTATCAGAACCAGCACCA | 2 | 1X |
| 69_LEFT | TGTCGCAAAATATACTCAACTGTGTCA | 1 | 1X |
| 69_RIGHT | TCTTTATAGCCACGGAACCTCCA | 1 | 1X |
| 70_LEFT | ACAAAAGAAAATGACTCTAAAGAGGGTTT | 2 | 7X |
| 70_RIGHT | TGACCTTCTTTTAAAGACATAACAGCAG | 2 | 7X |
| 71_LEFT | ACAAATCCAATTCAGTTGTCTTCCTATTC | 1 | 7X |
| 71_RIGHT | TGGAAAAGAAAGGTAAGAACAAGTCCT | 1 | 7X |
| 72_LEFT | ACACGTGGTGTTTATTACCCTGAC | 2 | 1X |
| 72_RIGHT | ACTCTGAACTCACTTTCCATCCAAC | 2 | 1X |
| 73_LEFT | CAATTTTGTAATGATCCATTTTTGGGTGT | 1 | 2.5X |
| 73_RIGHT | CACCAGCTGTCCAACCTGAAGA | 1 | 2.5X |
| 74_LEFT | ACATCACTAGGTTTCAAACTTTACTTGC | 2 | 7X |
| 74_RIGHT | GCAACACAGTTGCTGATTCTCTTC | 2 | 7X |
| 75_LEFT | AGAGTCCAACCAACAGAATCTATTGT | 1 | 7X |
| 75_RIGHT | ACCACCAACCTTAGAATCAAGATTGT | 1 | 7X |
| 76_LEFT | AGGGCAAACTGGAAAGATTGCT | 2 | 2.5X |
| 76_LEFT_alt3 | GGGCAAACTGGAAAGATTGCTGA | 2 | 2.5X |
| 76_RIGHT | ACACCTGTGCCTGTTAAACCAT | 2 | 2.5X |
| 76_RIGHT_alt0 | ACCTGTGCCTGTTAAACCATTGA | 2 | 2.5X |
| 77_LEFT | CCAGCAACTGTTTGTGGACCTA | 1 | 1X |
| 77_RIGHT | CAGCCCCTATTAAACAGCCTGC | 1 | 1X |
| 78_LEFT | CAACTTACTCCTACTTGGCGTGT | 2 | 1X |
| 78_RIGHT | TGTGTACAAAAACTGCCATATTGCA | 2 | 1X |
| 79_LEFT | GTGGTGATTCAACTGAATGCAGC | 1 | 1X |
| 79_RIGHT | CATTTCATCTGTGAGCAAAGGTGG | 1 | 1X |
| 80_LEFT | TTGCCTTGGTGATATTGCTGCT | 2 | 1X |
| 80_RIGHT | TGGAGCTAAGTTGTTTAACAAGCG | 2 | 1X |
| 81_LEFT | GCACTTGGAAAACTTCAAGATGTGG | 1 | 2.5X |
| 81_RIGHT | GTGAAGTTCTTTTCTTGTGCAGGG | 1 | 2.5X |
| 82_LEFT | GGGCTATCATCTTATGTCCTTCCCT | 2 | 1X |
| 82_RIGHT | TGCCAGAGATGTCACCTAAATCAA | 2 | 1X |
| 83_LEFT | TCCTTTGCAACCTGAATTAGACTCA | 1 | 2.5X |
| 83_RIGHT | TTTGACTCCTTTGAGCACTGGC | 1 | 2.5X |
| 84_LEFT | TGCTGTAGTTGTCTCAAGGGCT | 2 | 1X |
| 84_RIGHT | AGGTGTGAGTAAACTGTTACAAACAAC | 2 | 1X |
| 85_LEFT | ACTAGCACTCTCCAAGGGTGTT | 1 | 2.5X |
| 85_RIGHT | ACACAGTCTTTTACTCCAGATTCCC | 1 | 2.5X |
| 86_LEFT | TCAGGTGATGGCACAACAAGTC | 2 | 2.5X |
| 86_RIGHT | ACGAAAGCAAGAAAAAGAAGTACGC | 2 | 2.5X |
| 87_LEFT | CGACTACTAGCGTGCCTTTGTA | 1 | 1X |
| 87_RIGHT | ACTAGGTTCCATTGTTCAAGGAGC | 1 | 1X |
| 88_LEFT | CCATGGCAGATTCCAACGGTAC | 2 | 1X |
| 88_RIGHT | TGGTCAGAATAGTGCCATGGAGT | 2 | 1X |
| 89_LEFT | GTACGCGTTCCATGTGGTCATT | 1 | 2.5X |
| 89_LEFT_alt2 | CGCGTTCCATGTGGTCATTCAA | 1 | 2.5X |
| 89_RIGHT | ACCTGAAAGTCAACGAGATGAAACA | 1 | 2.5X |
| 89_RIGHT_alt4 | ACGAGATGAAACATCTGTTGTCACT | 1 | 2.5X |
| 90_LEFT | ACACAGACCATTCCAGTAGCAGT | 2 | 1X |
| 90_RIGHT | TGAAATGGTGAATTGCCCTCGT | 2 | 1X |
| 91_LEFT | TCACTACCAAGAGTGTGTTAGAGGT | 1 | 7X |
| 91_RIGHT | TTCAAGTGAGAACCAAAAGATAATAAGCA | 1 | 7X |
| 92_LEFT | TTTGTGCTTTTTAGCCTTTCTGCT | 2 | 1X |
| 92_RIGHT | AGGTTCCTGGCAATTAATTGTAAAAGG | 2 | 1X |
| 93_LEFT | TGAGGCTGGTTCTAAATCACCCA | 1 | 1X |
| 93_RIGHT | AGGTCTTCCTTGCCATGTTGAG | 1 | 1X |
| 94_LEFT | GGCCCCAAGGTTTACCCAATAA | 2 | 1X |
| 94_RIGHT | TTTGGCAATGTTGTTCCTTGAGG | 2 | 1X |
| 95_LEFT | TGAGGGAGCCTTGAATACACCA | 1 | 7X |
| 95_RIGHT | CAGTACGTTTTTGCCGAGGCTT | 1 | 7X |
| 96_LEFT | GCCAACAACAACAAGGCCAAAC | 2 | 1X |
| 96_RIGHT | TAGGCTCTGTTGGTGGGAATGT | 2 | 1X |
| 97_LEFT | TGGATGACAAAGATCCAAATTTCAAAGA | 1 | 7X |
| 97_RIGHT | ACACACTGATTAAAGATTGCTATGTGAG | 1 | 7X |
| 98_LEFT | AACAATTGCAACAATCCATGAGCA | 2 | 2.5X |
| 98_RIGHT | TTCTCCTAAGAAGCTATTAAAATCACATGG | 2 | 2.5X |

Primer sequences are from the ARTICv3 primer set (Quick 2020).

1 Relative primer concentration in each pool is indicated under Ratio.

Quick J, Loman NJ. hCoV-2019/nCoV-2019 Version 3 Amplicon Set. March 24, 2020. Available: <https://artic.network/resources/ncov/ncov-amplicon-v3.pdf>.

**Table S3. SARS-CoV-2 primer binding site mutations found in samples (n=3,506) collected between January and February of 2021**

| **Position**1 | **Reference**  **>Variant** | **Prevalence  in the study cohort, %**2 | **ARTICv3  Primer Name** | **Primer binding site mutation**3 **(5' to 3')** |
| --- | --- | --- | --- | --- |
| 1,578 | T>C | 1.3 | nCoV-2019_6_LEFT | GGTGcTGTTGGAGAAGGTTCCG |
| 2,258 | G>A | 2.7 | nCoV-2019_7_RIGHT | TGCACAGGTGAtAATTTGTCCA |
| 2,258 | G>A | 2.7 | nCoV-2019_7_RIGHT_alt5 | AGGTGAtAATTTGTCCACCGAC |
| 4,683 | C>T | 1.0 | nCoV-2019_15_RIGHT_alt3 | ACTGTAaCTGGCACTTTGAGAGA |
| 5,011 | A>C | 1.7 | nCoV-2019_16_RIGHT | CACAACgTGCGTGTGGAGGTTA |
| 5,869 | C>T | 2.5 | nCoV-2019_20_LEFT | AtAAAGAAAACAGTTACACAACAACCA |
| 6,730 | C>T | 1.0 | nCoV-2019_23_LEFT | ACAACTACTAAtATAGTTACACGGTGT |
| 8,264 | G>T | 1.7 | nCoV-2019_28_LEFT | ACATAGAAGTTACTtGCGATAGTTGT |
| 9,204 | A>G | 2.7 | nCoV-2019_31_LEFT | TTCTGAGTACTGTAGGCACGGC |
| 10,369 | C>T | 1.3 | nCoV-2019_35_LEFT | TGTTCGtATTCAACCAGGACAG |
| 10,741 | C>T | 2.3 | nCoV-2019_35_RIGHT | ACTTCATAGCCACAAGGTTAAAaTCA |
| 12,484 | C>T | 1.4 | nCoV-2019_41_RIGHT | TGGTATaACAACCATTAGTTTGGCT |
| 12,789 | C>T | 4.2 | nCoV-2019_42_RIGHT | CCTACCTCCCTTTaTTGTGTTGT |
| 13,019 | C>T | 2.3 | nCoV-2019_44_LEFT | TGCCACAGTACGTtTACAAGCT |
| 13,019 | C>T | 2.3 | nCoV-2019_44_LEFT_alt3 | CCACAGTACGTtTACAAGCTGG |
| 16,500 | A>C | 1.3 | nCoV-2019_54_RIGHT | AACCAAAAACgTGTCCATTAGCACA |
| 21,364 | C>T | 1.9 | nCoV-2019_71_LEFT | ACAAATtCAATTCAGTTGTCTTCCTATTC |
| 22,018 | G>T | 17.7 | nCoV-2019_72_RIGHT | ACTCTGAACTCACTTTCCATaCAAC |
| 22,335 | G>T | 1.9 | nCoV-2019_73_RIGHT | CACCAGCTGTCaAACCTGAAGA |
| 23,191 | C>T | 1.4 | nCoV-2019_76_RIGHT | ACACCTGTGCCTGTTAAACCAT |
| 25,907 | G>T | 41.6 | nCoV-2019_86_LEFT | TCAGtTGATGGCACAACAAGTC |
| 26,305 | C>G | 1.3 | nCoV-2019_86_RIGHT | ACGAAAGCAAcAAAAAGAAGTACGC |
| 28,087 | C>T | 2.7 | nCoV-2019_93_LEFT | TGAGGtTGGTTCTAAATCACCCA |
| 29,362 | C>T | 17.9 | nCoV-2019_96_RIGHT | TAGGCTCTGTTGGTGGaAATGT |
| 29,377 | T>A | 1.5 | nCoV-2019_96_RIGHT | TtGGCTCTGTTGGTGGGAATGT |

1 Variant position is shown against a SARS-CoV-2 reference genome 0MN908947.3.

2 Shown only prevalence >1%

3 Red lower case indicates mutation in the primer binding site.

**Table S4. SARS-CoV-2 clade comparison between the high-throughput 2-step PCR workflow and a standard ARTIC v3 workflow**

|  |  | |  |  |  |  |  |  |  |  |  |  |  |  |  |  | |  | |  | |
| --- | --- | --- | --- | --- | --- | --- | --- | --- | --- | --- | --- | --- | --- | --- | --- | --- | --- | --- | --- | --- | --- |
|  |  | | **Clade by ARTIC v3 method** | | | | | | | | | | | | | |  | |  | |  | |
|  | Clade1 | 19B | | 20A | 20B | 20C | 20G | 20H (Beta, V2) | 20I (Alpha, V1) | 20J (Gamma, V3) | 21A (Delta) | 21C (Epsilon) | 21D (Eta) | 21F (Iota) | 21G (Lambda) | 21H | | Total | |  | |
| **Clade by 2-step PCR method** | 19B | | 3 |  |  |  |  |  |  |  |  |  |  |  |  |  | | 3 | |  | |
| 20A | |  | 53 |  |  |  |  |  |  |  |  |  |  |  |  | | 53 | |  | |
| 20B | |  |  | 105 |  |  |  | 1 |  |  |  |  |  |  |  | | 106 | |  | |
| 20C | |  |  |  | 98 |  |  |  |  |  |  |  |  |  |  | | 98 | |  | |
| 20G | |  |  |  |  | 175 |  |  |  |  |  |  |  |  |  | | 175 | |  | |
| 20H (Beta, V2) | |  |  |  |  |  | 7 |  |  |  |  |  |  |  |  | | 7 | |  | |
| 20I (Alpha, V1) | |  |  |  |  |  |  | 713 |  |  |  |  |  |  |  | | 713 | |  | |
| 20J (Gamma, V3) | |  |  |  |  |  |  |  | 44 |  |  |  |  |  |  | | 44 | |  | |
| 21A (Delta) | |  |  |  |  |  |  |  |  | 1 |  |  |  |  |  | |  | |  | |
| 21C (Epsilon) | |  |  |  |  |  |  |  |  |  | 101 |  |  |  |  | | 101 | |  | |
| 21D (Eta) | |  |  |  |  |  |  |  |  |  |  | 10 |  |  |  | | 10 | |  | |
| 21F (Iota) | |  |  |  |  |  |  |  |  |  |  |  | 131 |  |  | | 131 | |  | |
| 21G (Lambda) | |  |  |  |  |  |  |  |  |  |  |  |  | 1 |  | | 1 | |  | |
|  | 21H | |  |  |  |  |  |  |  |  |  |  |  |  |  | 3 | | 3 | |  | |
|  | Total | | 3 | 53 | 105 | 98 | 175 | 7 | 714 | 44 |  | 101 | 10 | 131 | 1 | 3 | | 1446 | |  | |
|  |  | |  |  |  |  |  |  |  |  |  |  |  |  |  |  | |  | |  | |

1 SARS-CoV-2 clades were assigned with Nextclade (<https://clades.nextstrain.org/>).

**Table S5. SARS-CoV-2 lineage comparison between the high-throughput 2-step PCR workflow and a standard ARTIC v3 workflow**


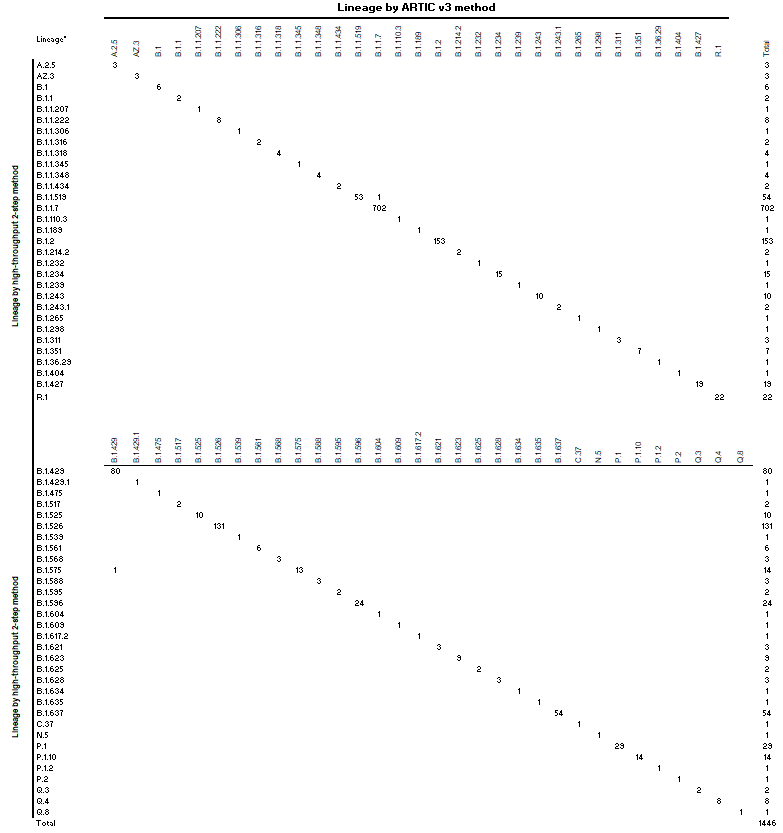


**Table S6. SARS-CoV-2 primer binding site mutations causing amplicon dropout by a standard ARTIC v3 workflow**

| **Clade** | **Number  Sample** | **Failed  Amplicon** | **Affected Primer** | **Primer Sequence**1 **(5' to 3')** | **Position**2 | **Reference** | **Variant** |
| --- | --- | --- | --- | --- | --- | --- | --- |
| 20H (Beta, V2) | 7 | ARTICv3-74 | nCoV-2019_74_LEFT | ACATCACTAGGTTTCAAAC(tttacttgc) | 22281 | C | -TTTACTTGC |
| 21A (Delta) | 1 | ARTICv3-72 | nCoV-2019_72_RIGHT | ACTC(tgaact)CACTTTCCATCCAAC | 22028 | G | -AGTTCA |
| 21C (Epsilon) | 113 | ARTICv3-72 | nCoV-2019_72_RIGHT | ACTCTGAACTCACTTTCCATaCAAC | 22018 | G | T |
| 21G (Lambda) | 1 | ARTICv3-97 | nCoV-2019_97_LEFT | TGGATGACAAAGATCCAAATTTtAAAGA | 29311 | C | T |
| nCoV-2019_97_RIGHT | ACACACTGATTAAAGATTaCTATGTGAG | 29675 | C | T |

1 Red lower case indicates mutation in the primer binding site; deleted nucleotides are shown in parentheses.

2 Variant position is shown against a SARS-CoV-2 reference genome 0MN908947.3.

**Table S7. Proportion of samples generating complete SARS-CoV-2 consensus sequence by the high-throughput workflow and a standard ARTIC v3 workflow**

|  | **High-throughput workflow** | | | |  | **ARTIC v3 workflow** | | | |
| --- | --- | --- | --- | --- | --- | --- | --- | --- | --- |
| Clade | Number complete | Number incomplete | Total assessed | Percent complete |  | Number complete | Number incomplete | Total assessed | Percent complete |
| 20H (Beta, V2) | 4 | 1 | 5 | 80.0 |  | 16 | 69 | 85 | 18.8 |
| 21A (Delta) | 855 | 42 | 897 | 95.3 |  | 4 | 515 | 519 | 0.8 |
| 21C (Epsilon) | 7 | 0 | 7 | 100.0 |  | 5 | 256 | 261 | 1.9 |
| 21G (Lambda) | 15 | 3 | 18 | 83.3 |  | 1 | 29 | 30 | 3.3 |
| Total | 881 | 46 | 927 | 95.0 |  | 26 | 869 | 895 | 2.9 |

Different sample set was used between the two workflows.

Percent genome coverage was determined by counting the number of nucleotides meeting minimum coverage requirement divided by the total SARS-CoV-2 genome length excluding the 5’ (1-54nt) and 3’ (29,836–29,903nt) ends not covered by the amplicon panel.
